# Supplementary material
Source: PubMed Central journal article supplement (PMC6938689)

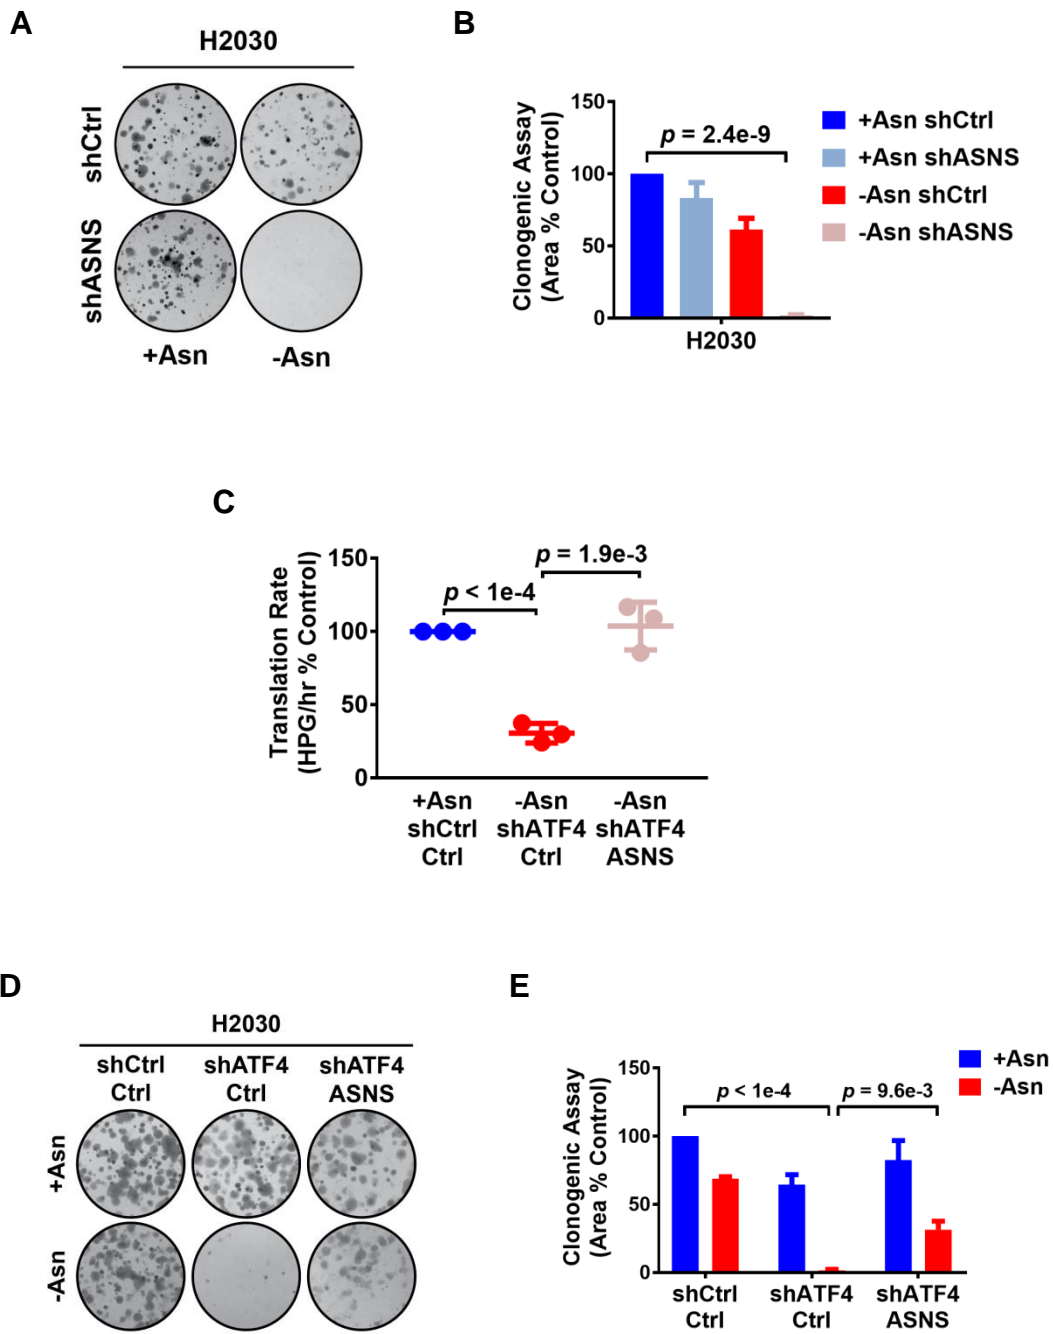

Figure S5

Supplement: NIHMS1540725-supplement-10.pdf [file NIHMS1540725-supplement-10.pdf]

**A**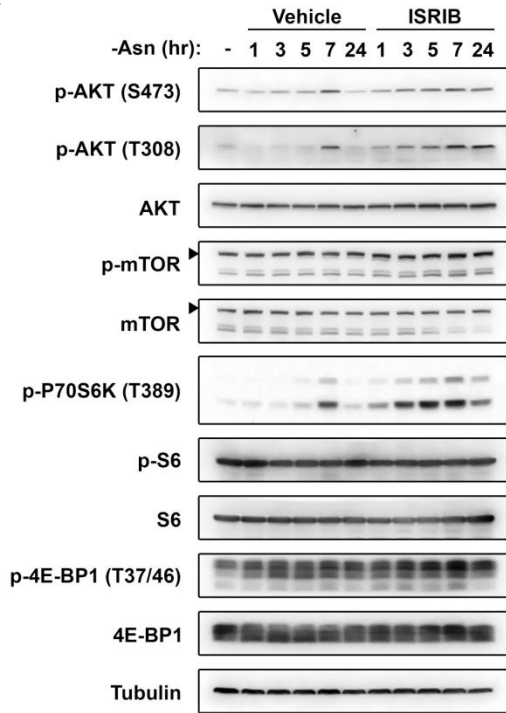**B**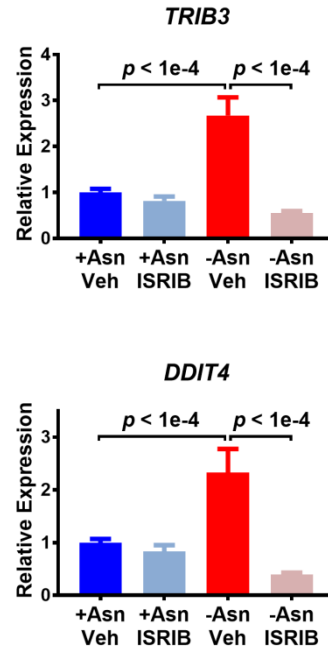**C**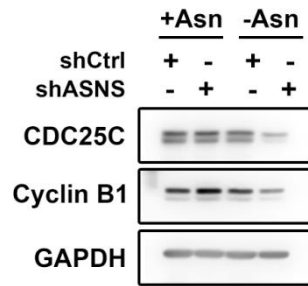**D**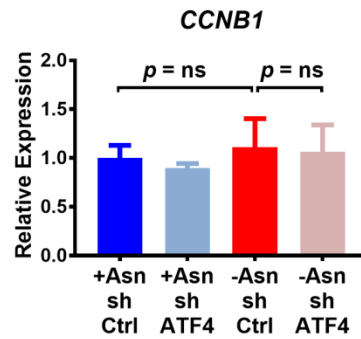**E**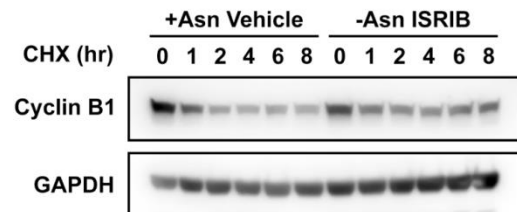

Supplement: NIHMS1540725-supplement-11.pdf [file NIHMS1540725-supplement-11.pdf]

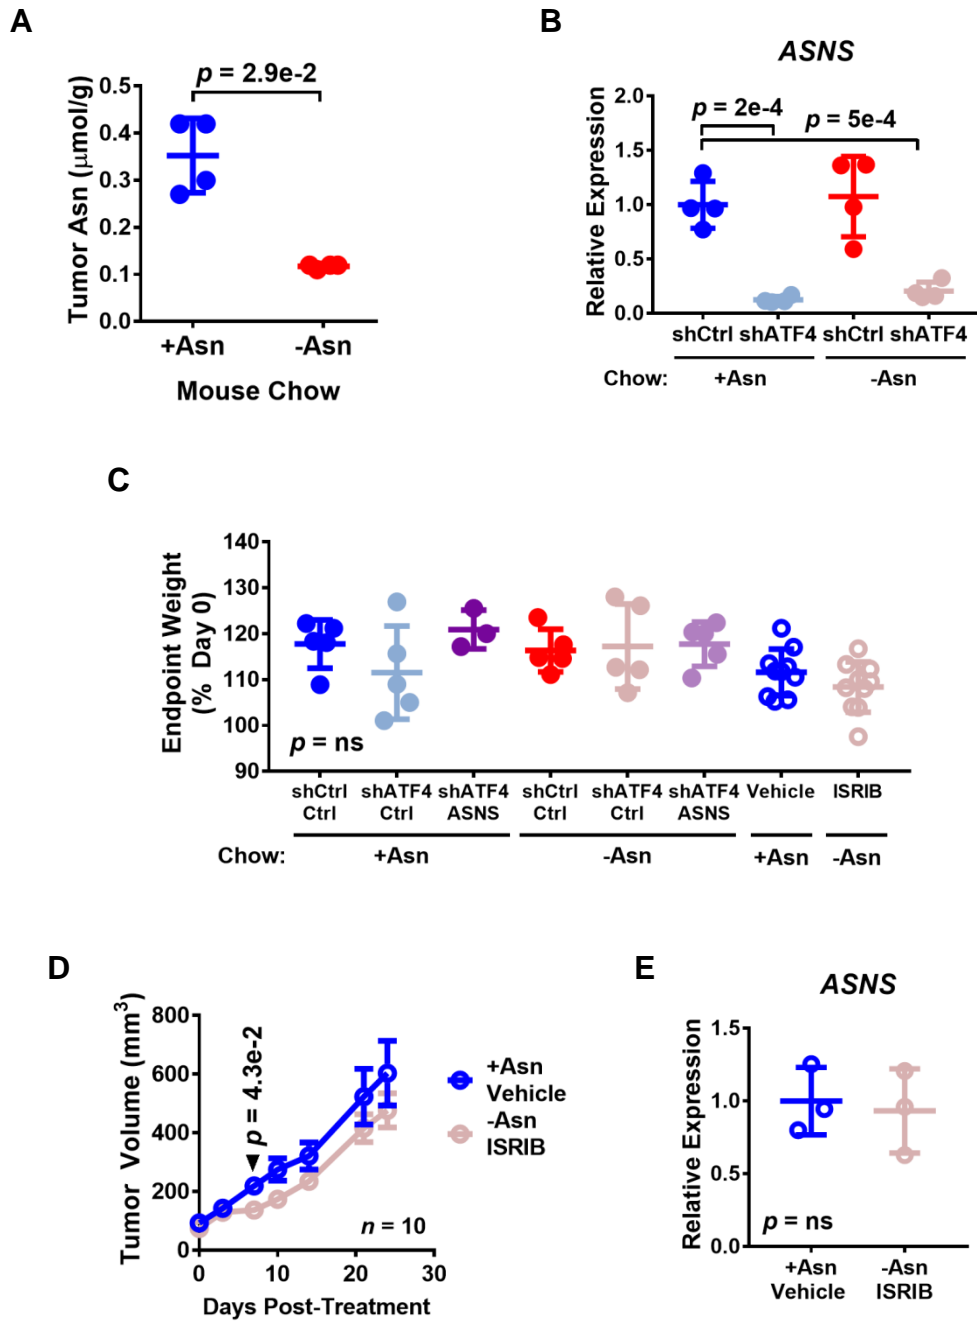

Figure S7

Supplement: NIHMS1540725-supplement-12.pdf [file NIHMS1540725-supplement-12.pdf]

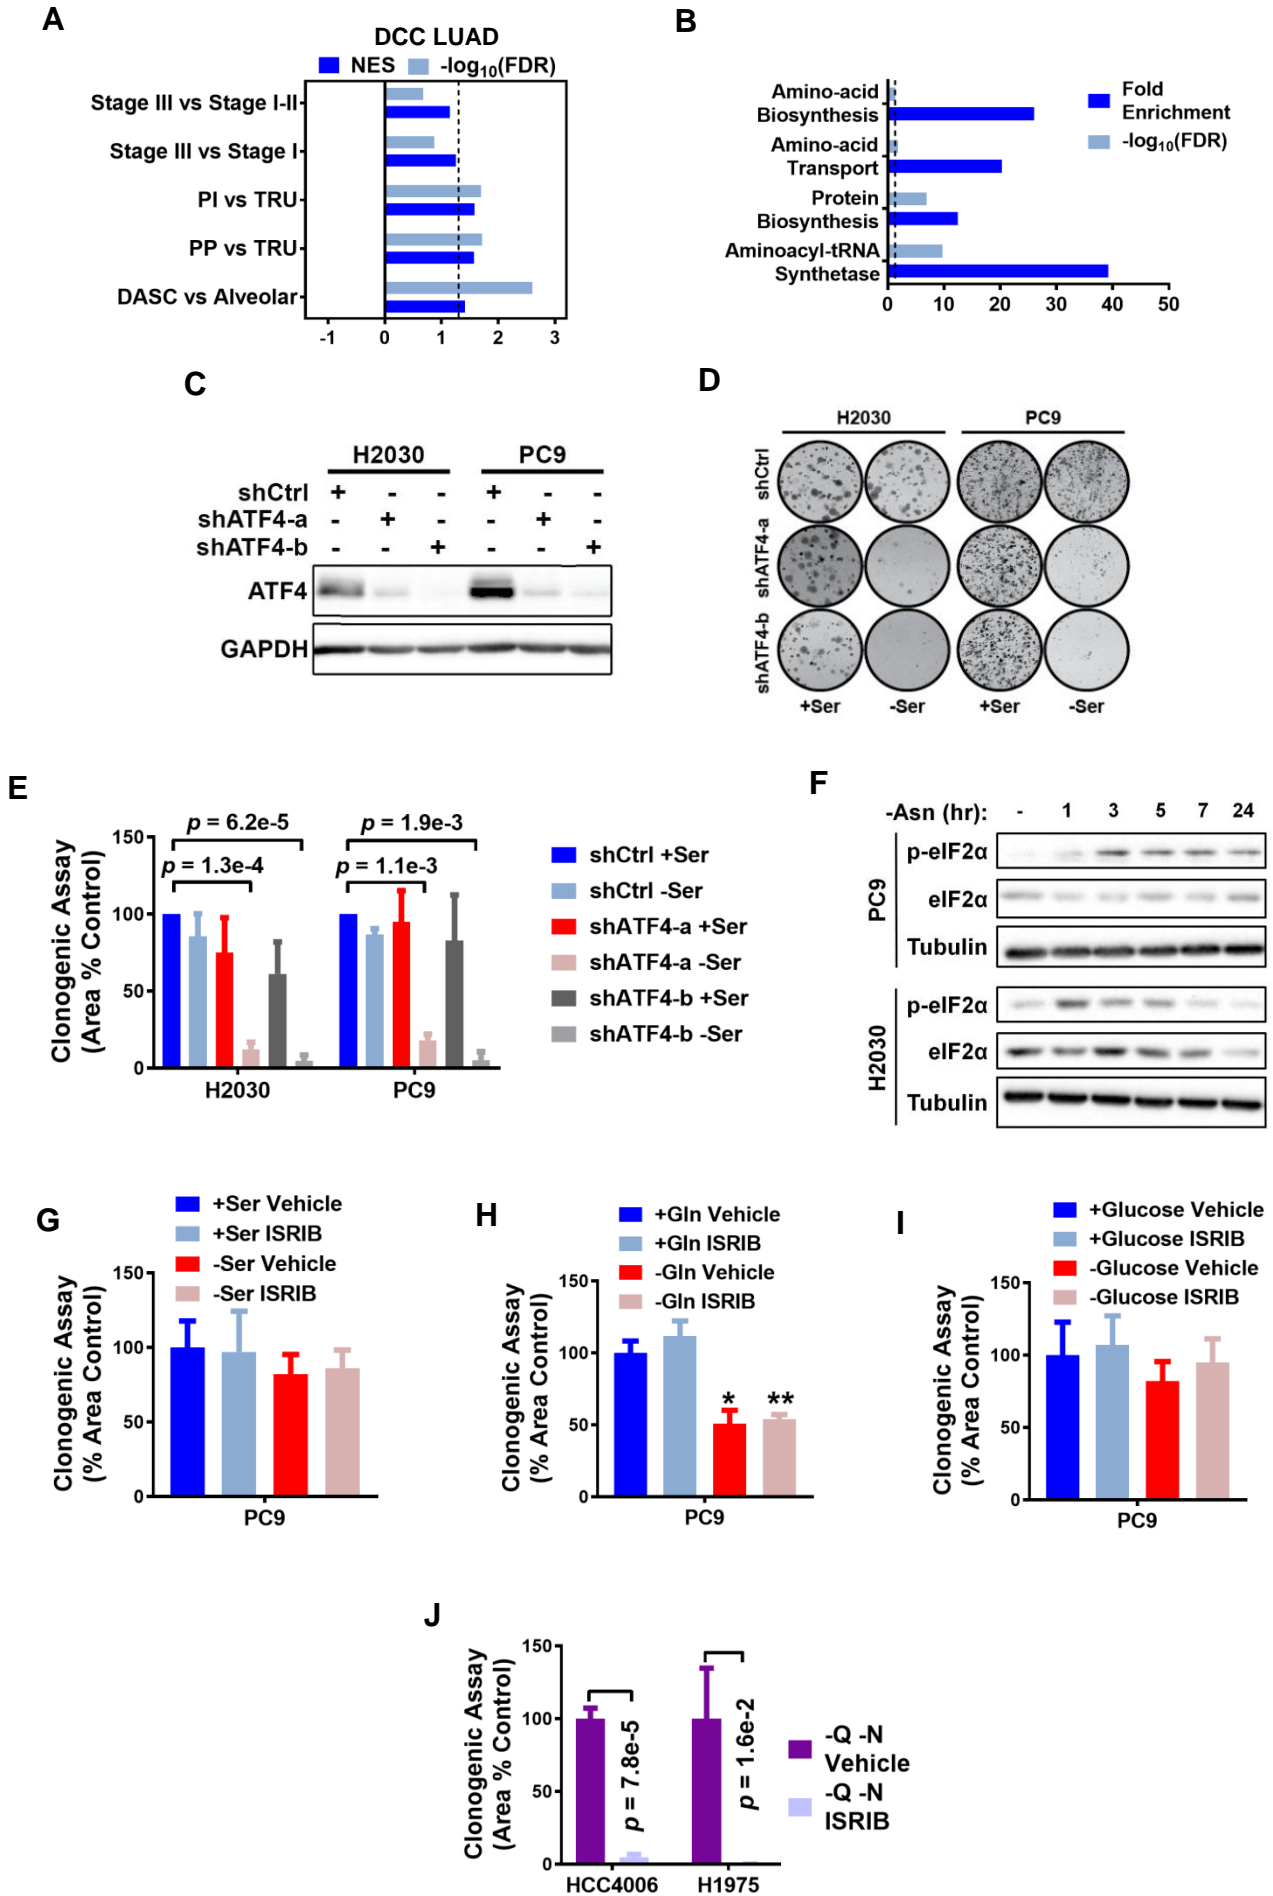

Figure S1

Supplement: NIHMS1540725-supplement-6.pdf [file NIHMS1540725-supplement-6.pdf]

**A**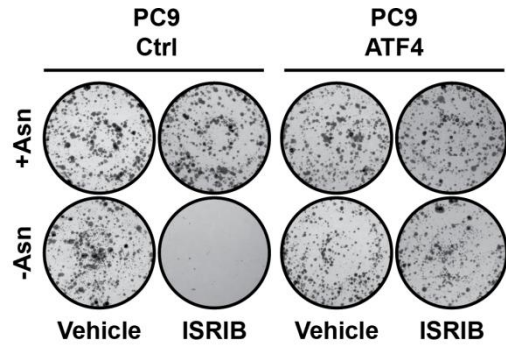**B**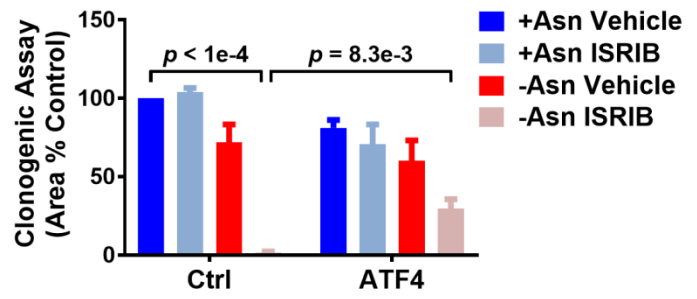**C**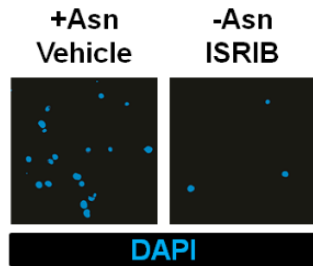**D**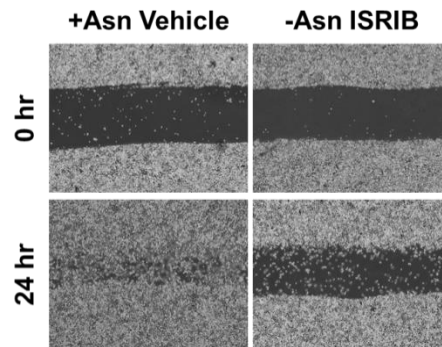

Supplement: NIHMS1540725-supplement-7.pdf [file NIHMS1540725-supplement-7.pdf]

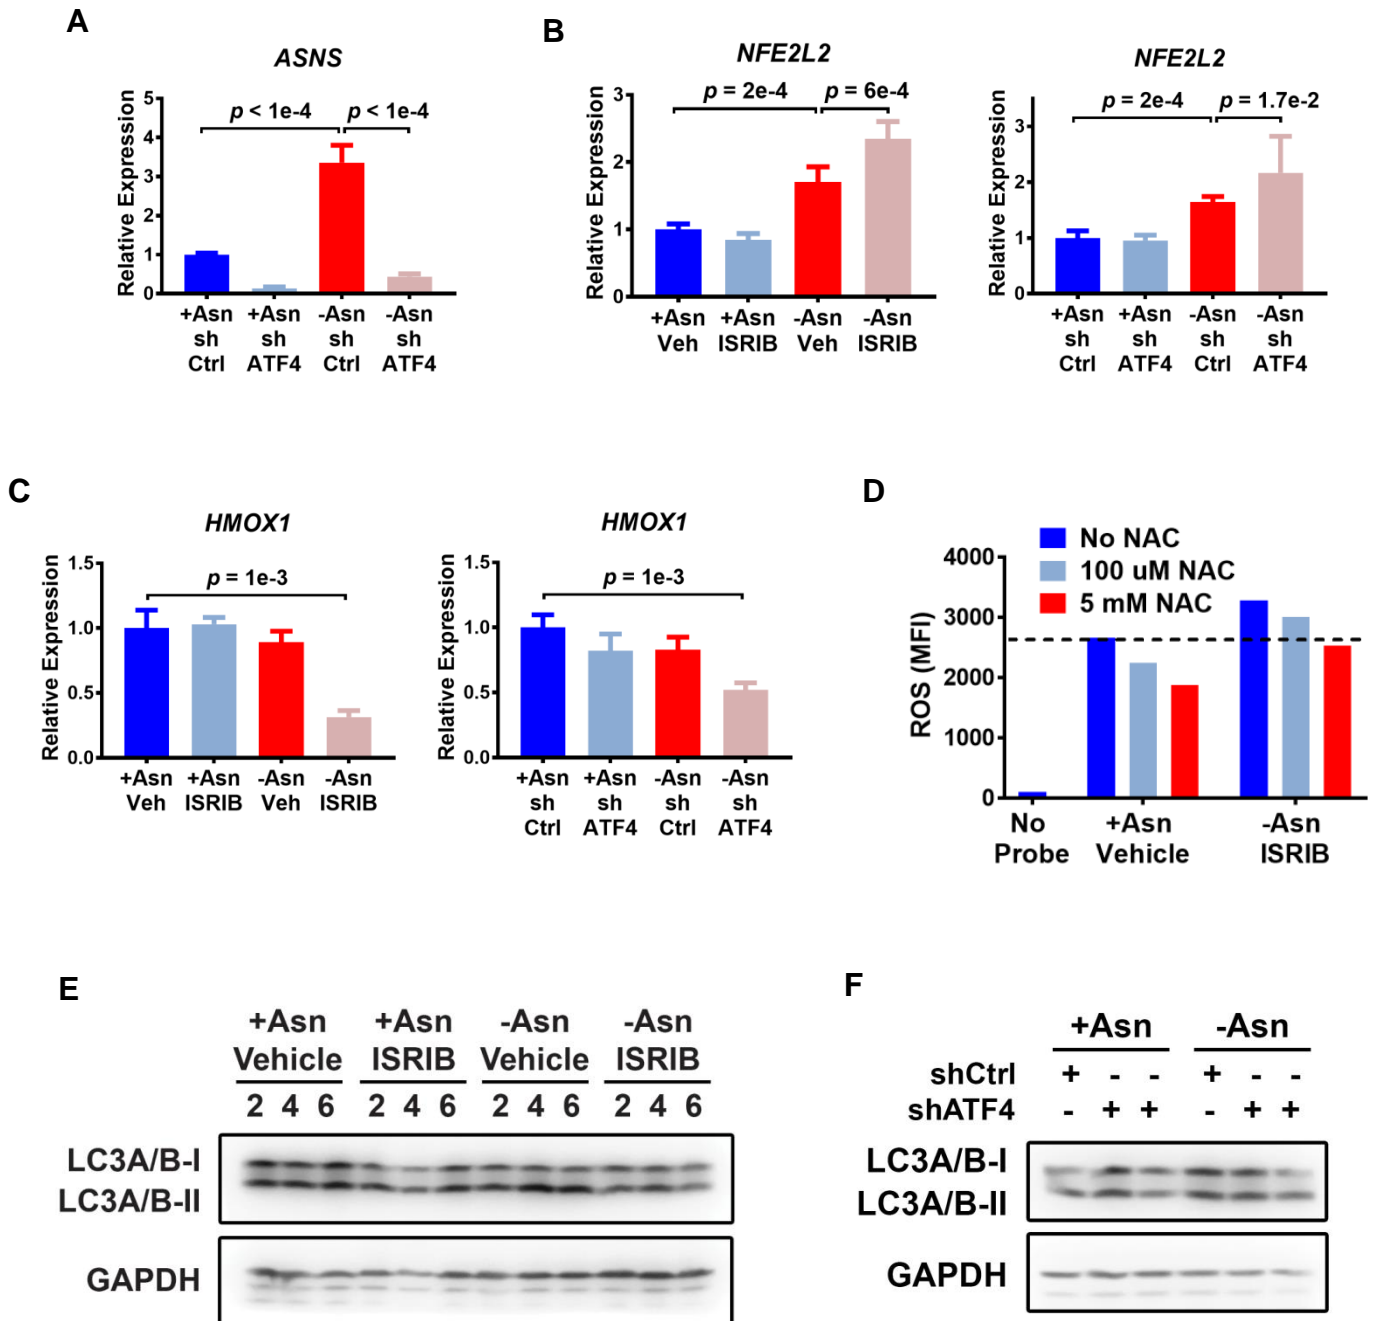

Figure S3

Supplement: NIHMS1540725-supplement-8.pdf [file NIHMS1540725-supplement-8.pdf]

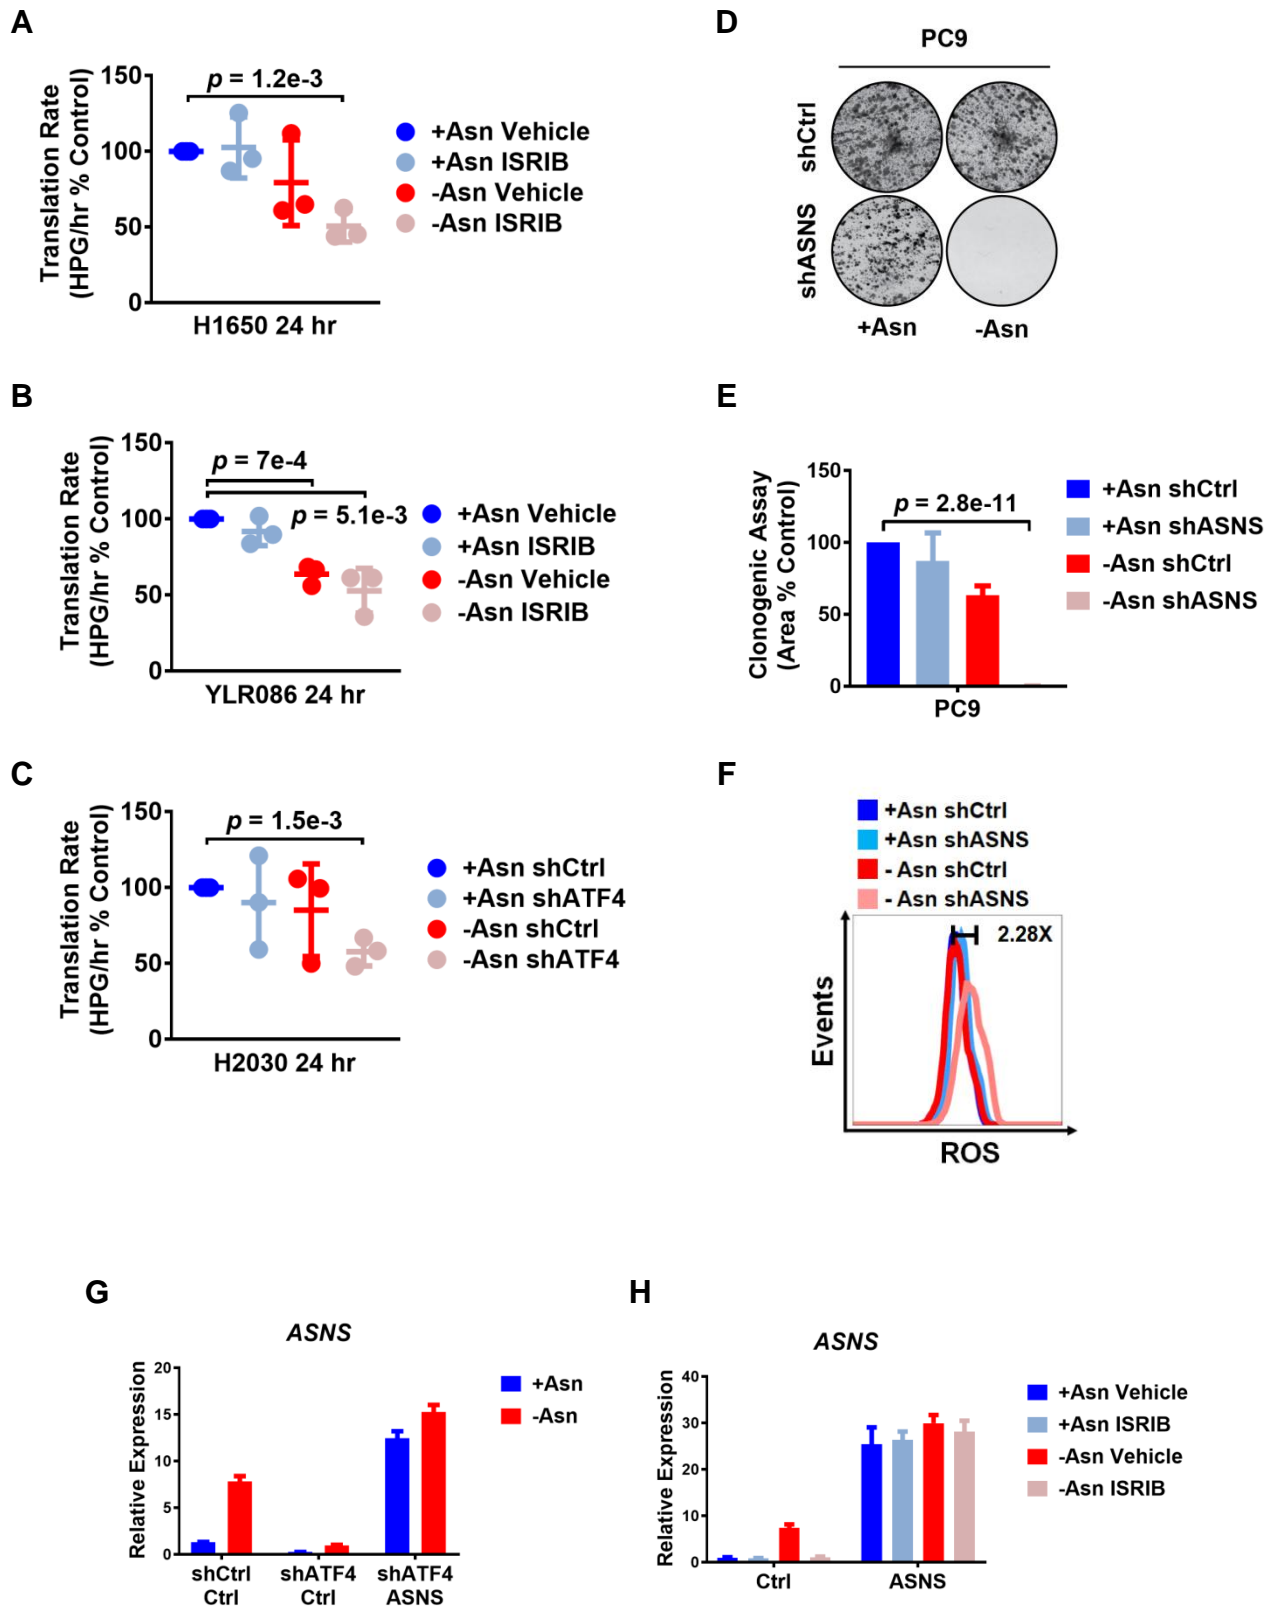

Figure S4

Supplement: NIHMS1540725-supplement-9.pdf [file NIHMS1540725-supplement-9.pdf]
